# Supplementary material for: Bystander activated CD8+ T cells mediate neuropathology during viral infection via antigen-independent cytotoxicity
Source: PubMed Central journal article supplement (PMC10844499; doi:10.1038/s41467-023-44667-0), 2024-02-05
Supplement: 41467_2023_44667_MOESM1_ESM.pdf [file 41467_2023_44667_MOESM1_ESM.pdf]

1 Supplementary Fig. 1

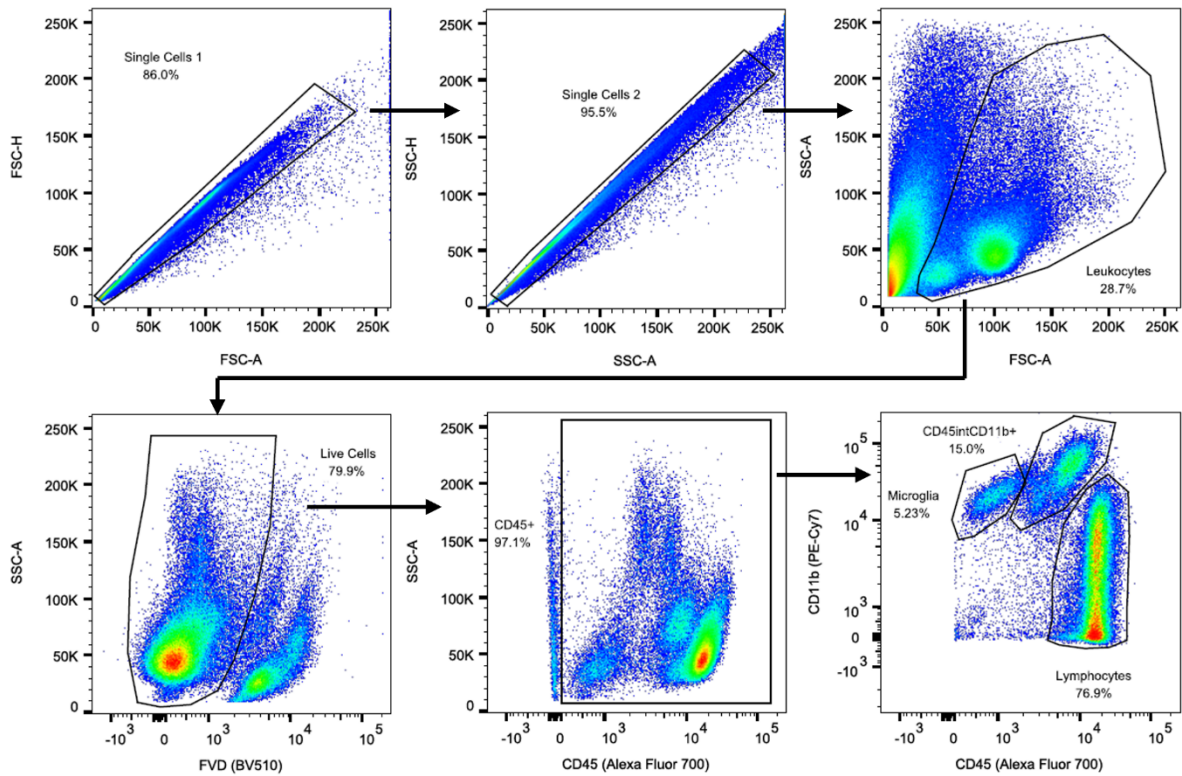

2

3 **Supplementary Fig. 1. Gating strategy for analysis of brain immune cells following ZIKV**

4 **infection.** Representative flow cytometry plots of brain immune cells. Cells are gated on singlets

5 twice (FSC-A/FSC-H, SSC-A/SSC-H) then gated on leukocytes. Live cells are gated on CD45

6 and assessed for microglia (CD45<sup>lo</sup>CD11b<sup>+</sup>), activated macrophages/microglia

7 (CD45<sup>int/hi</sup>CD11b<sup>+</sup>), and lymphocytes (CD45<sup>hi</sup>CD11b<sup>low/int</sup>). FVD = fixable viability dye.

8 Supplementary Fig. 2

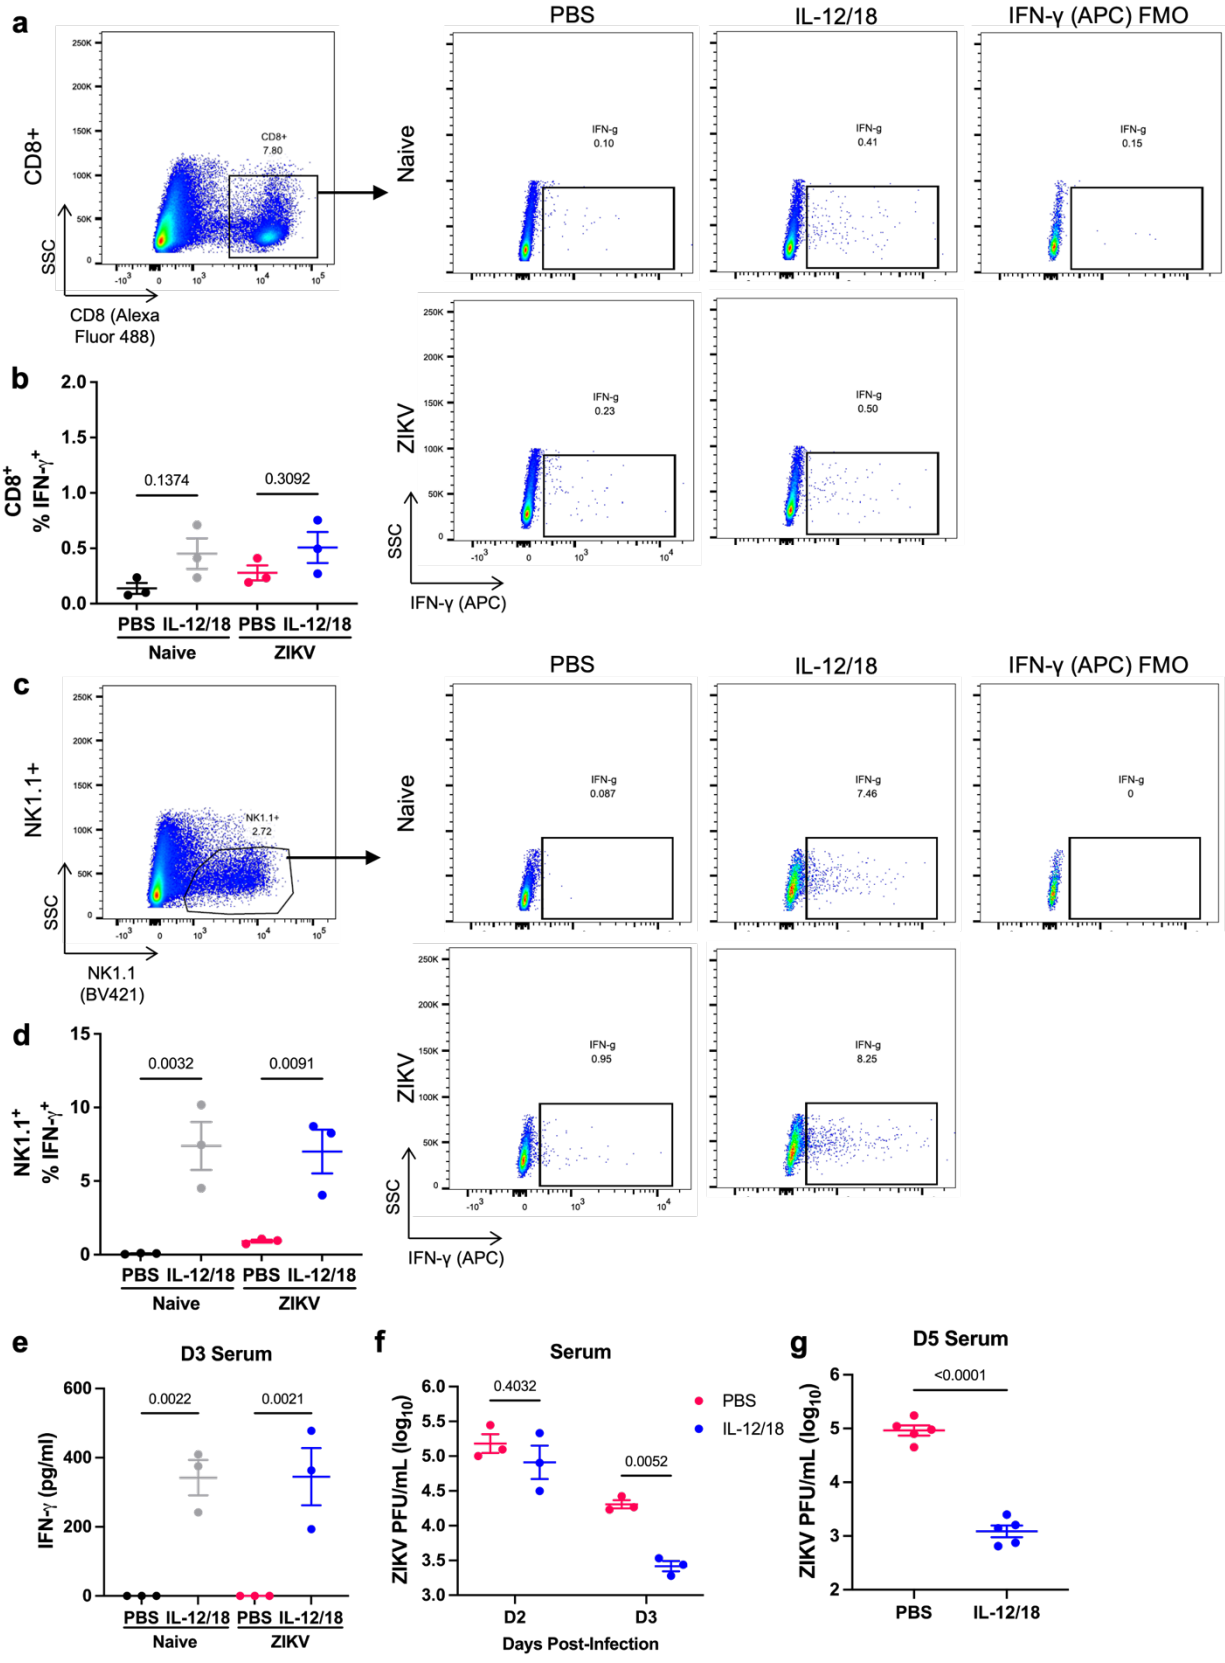

10 **Supplementary Fig. 2. IL-12/18 treatment induces NK cell IFN- $\gamma$  production.** PBS (naïve)  
11 and ZIKV-infected mice were administered IP treatments of PBS or IL-12/18 at 1 and 2 dpi.  
12 Spleens were harvested and cells isolated for flow cytometry analysis at 3 dpi. A) Representative  
13 gating of spleen CD8<sup>+</sup> T cells and CD8<sup>+</sup> T cell intracellular IFN- $\gamma$  at 3 dpi. B) Quantification of  
14 spleen CD8<sup>+</sup> T cell intracellular IFN- $\gamma$  (n=3). C) Representative gating of spleen NK1.1<sup>+</sup> cells  
15 and NK cell intracellular IFN- $\gamma$  at 3 dpi. D) Quantification of spleen NK cell intracellular IFN- $\gamma$   
16 (n=3). E) Serum was collected at 3 dpi for quantification of IFN- $\gamma$  by ELISA (n=3). F) Serum  
17 was collected from ZIKV-infected mice at 2 and 3 dpi for quantification by plaque assay (n=3).  
18 G) Serum was collected from ZIKV-infected mice at 5 dpi for ZIKV plaque assay (n=5). Data  
19 represent mean  $\pm$  SEM (B, D, E-G). Statistical significance was determined by two-way  
20 ANOVA with Sidak's multiple comparisons test (B, D-F) or two-tailed student's t-test (G). FMO  
21 = fluorescence minus one. Source data are provided as a Source Data file.

22 Supplementary Fig. 3

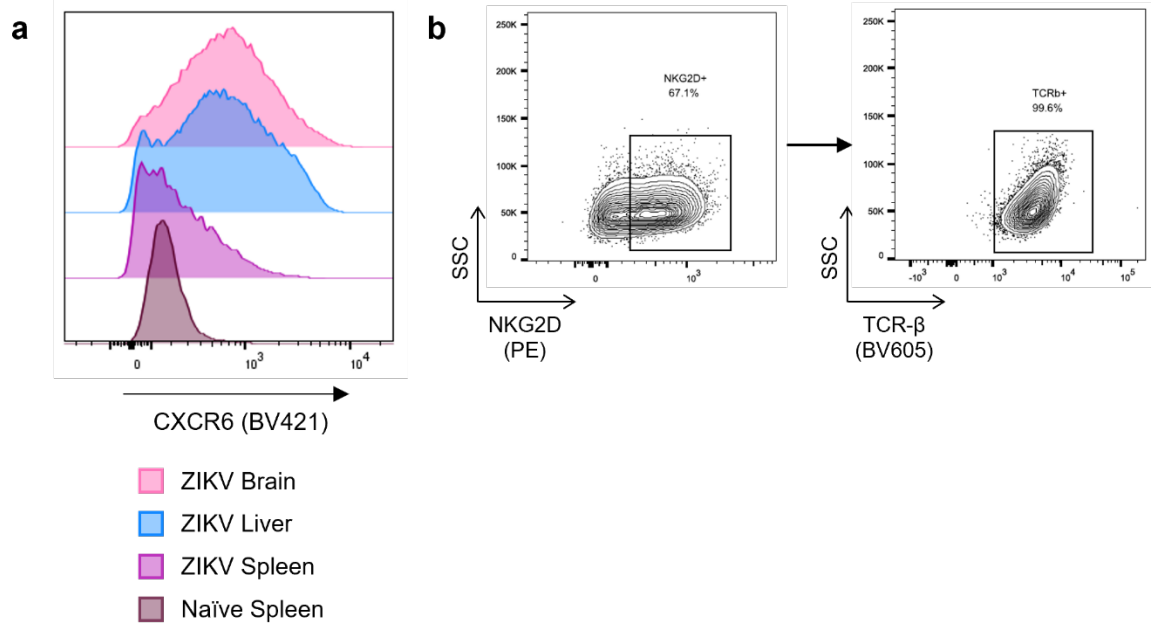

23

24

25 **Supplementary Fig. 3. ZIKV infection in mice elicits bystander activation of conventional**

26 **CD8<sup>+</sup> T cells.** A) Representative histograms of CXCR6 expression by CD8<sup>+</sup> T cells from various

27 organs of naïve and ZIKV infected mice. B) Representative flow cytometry plot demonstrating

28 TCR-β expression on NKG2D<sup>+</sup>CD8<sup>+</sup> T cells isolated from ZIKV-infected mouse brains.

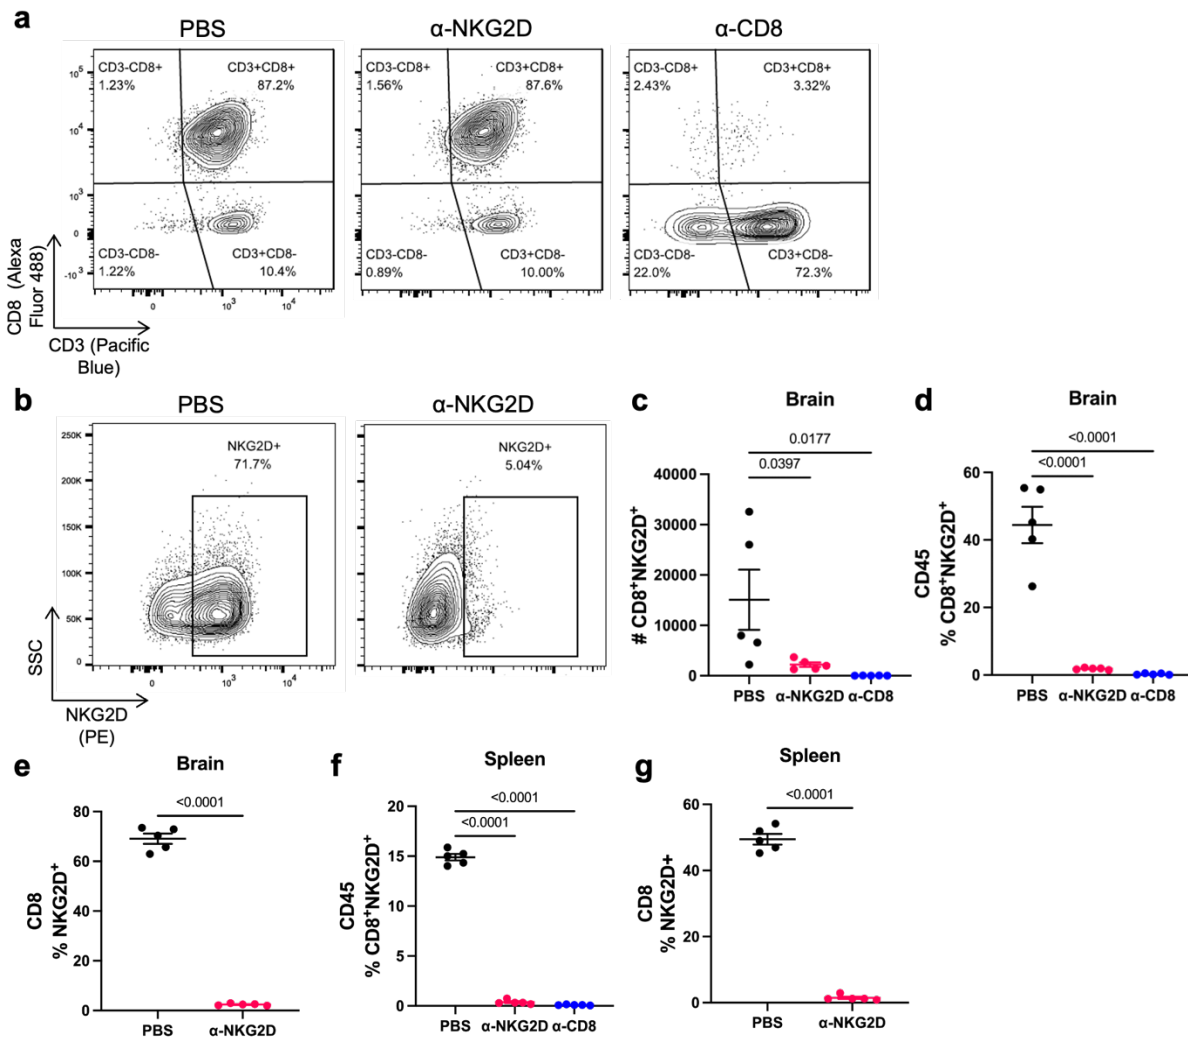

30

31

32 **Supplementary Fig. 4. Antibody depletion of CD8 and blockade of NKG2D in ZIKV-**

33 **infected mice.** A) Representative flow cytometry plots of lymphocytes from the brains of PBS,

34  $\alpha$ -NKG2D, and  $\alpha$ -CD8-treated ZIKV-infected mice. B) Representative flow cytometry plots of

35 brain CD8<sup>+</sup> T cell NKG2D expression following PBS or  $\alpha$ -NKG2D treatment of ZIKV-infected

36 mice. C) Count of CD8<sup>+</sup>NKG2D<sup>+</sup> T cells in the brains of PBS,  $\alpha$ -NKG2D, and  $\alpha$ -CD8-treated

37 ZIKV-infected mice (n=5). D) Proportion of brain CD45<sup>+</sup> cells that were CD8<sup>+</sup>NKG2D<sup>+</sup> (n=5).

38 E) Proportion of brain CD8<sup>+</sup> T cells from ZIKV-infected mice that were NKG2D<sup>+</sup> (n=5). F)

39 Proportion of spleen CD45<sup>+</sup> cells that were CD8<sup>+</sup>NKG2D<sup>+</sup> (n=5). G) Proportion of spleen CD8<sup>+</sup>  
40 T cells that were NKG2D<sup>+</sup> (n=5). Data represent mean  $\pm$  SEM (C-G). Statistical significance was  
41 determined by one-way ANOVA with Dunnett's multiple comparisons test (C, D, F) or two-  
42 tailed student's t-test (E, G). Source data are provided as a Source Data file.

43 Supplementary Fig. 5

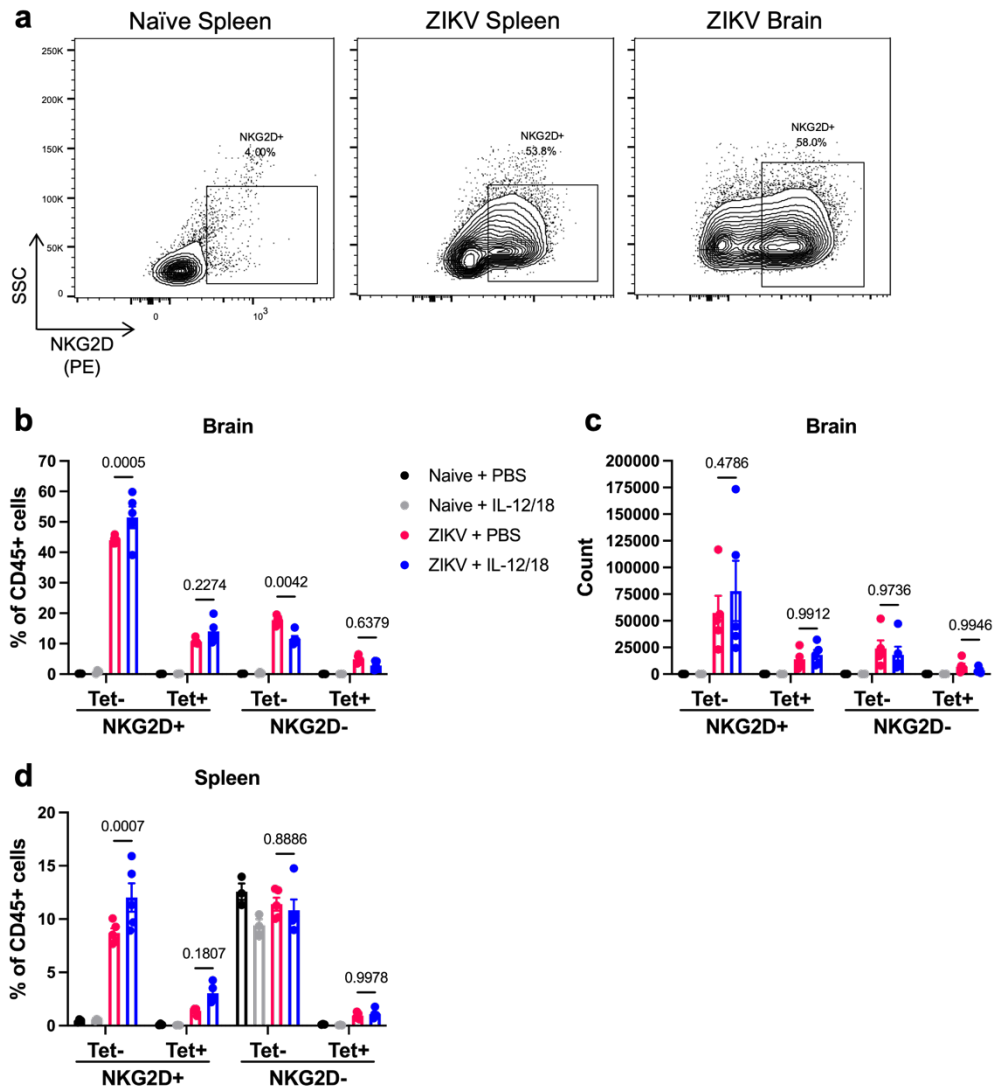

44

45 **Supplementary Fig. 5. NKG2D expression and tetramer staining on spleen and brain CD8+**

46 **T cells from naïve or ZIKV-infected mice.** A) Representative flow cytometry plots of CD8+ T

47 cells from the spleens and brains of naïve (PBS-treated) or ZIKV-infected mice. B-D) *Ifnar-/-*

48 mice were infected with PBS (naïve) or  $4 \times 10^5$  PFU ZIKV ZIKV and treated with PBS or IL-

49 12/18 at 1 and 2 dpi. Brains and spleens were harvested for flow cytometry analysis. B) The

50 proportion of brain CD45+ cells that were CD8+, gated on NKG2D and ZIKV tetramer staining

51 (n=3, 5). C) Counts of CD8+ T cells gated on NKG2D and ZIKV tetramer staining (n=3, 5). D)

52 The proportion of spleen CD45<sup>+</sup> cells that were CD8<sup>+</sup>, gated on NKG2D and ZIKV tetramer  
53 staining (n=3, 5). Data represents mean  $\pm$  SEM (B-D). Statistical significance was determined by  
54 two-way ANOVA with Tukey's multiple comparison test (B-D). Tet = Tetramer. Source data are  
55 provided as a Source Data file.



56 Supplementary Fig. 6

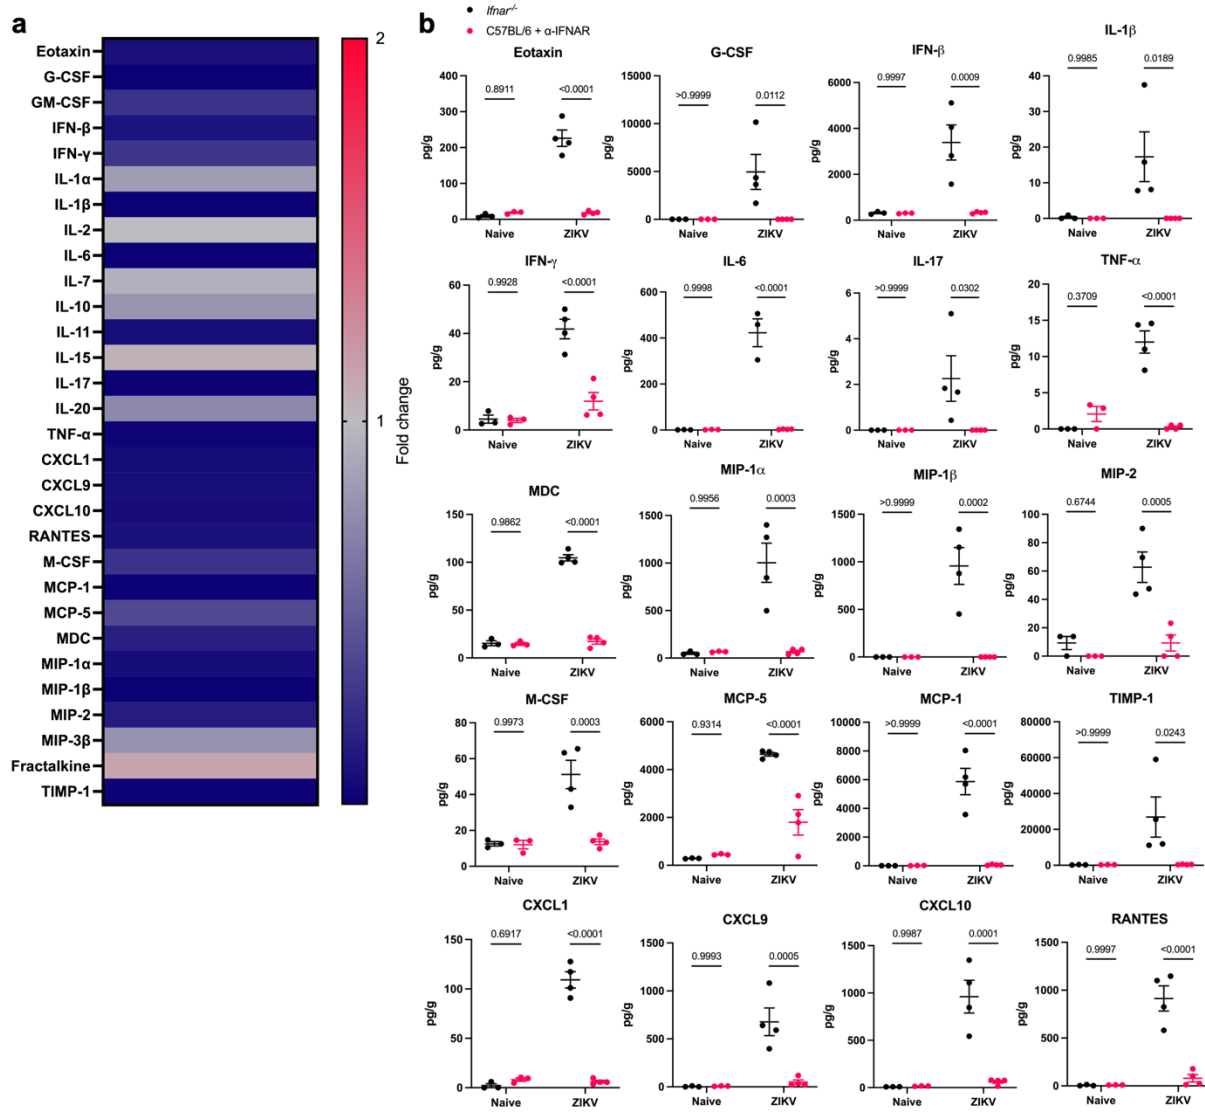

57

58 **Supplementary Fig 6.  $\alpha$ -IFNAR-treated C57BL/6 mice are protected from ZIKV-induced**

59 **inflammation in the brain.** C57BL/6 mice were treated with  $\alpha$ -IFNAR antibody at -1, 0, 1, 3, 5

60 dpi and infected via FTPD with  $1.4 \times 10^6$  ZIKV PFU. *Ifnar*<sup>-/-</sup> mice were infected via FTPD with

61  $4 \times 10^5$  ZIKV PFU. Brains were collected at 7 dpi and homogenized for multiplex cytokine analysis.

62 A) Heatmap depicting fold change of mean cytokine concentrations of brains from ZIKV-infected

63 C57BL/6 +  $\alpha$ -IFNAR mice (n=4) compared to *Ifnar*<sup>-/-</sup> mice (n=4). B) Graphs of

64 cytokines/chemokines of interest that were significantly lower in the brains of C57BL/6 +  $\alpha$ -

65 IFNAR mice compared to *Ifnar*<sup>-/-</sup> mice (n=3, 3, 4, 4). Data represent mean ± SEM and statistical  
66 significance was determined by two-way ANOVA with Sidak's multiple comparisons test. Source  
67 data are provided as a Source Data file.
